# Supplementary material
Source: PubMed Central journal article supplement (PMC3835663)
Supplement: NIHMS527794-supplement-1_si_001.pdf [file NIHMS527794-supplement-1_si_001.pdf]

## Supplemental Information

### Role of aldehydes in the toxic and mutagenic effects of nitrosamines

Lisa A. Peterson, Anna M. Urban, Choua C. Vu, Meredith E. Cummings, Lee C. Brown, Janel K. Warmka, Li Li, Elizabeth V. Wattenberg, Yesha Patel, Daniel O. Stram, and Anthony E. Pegg.

#### Table of Contents

p. S2: Table S1. Cytotoxicity and mutagenicity data obtained for NMUr, AMMN and NNK-4-OAc in CHO<sup>pcDNA3</sup> and CHO<sup>AGT</sup> cells.

p. S3: Figure S1. Cytotoxicity (A-C) or mutagenicity (D-F) compared to levels of *O*<sup>6</sup>-mG detected in CHO<sup>pcDNA3</sup> and cells immediately after a 1 h treatment with NMUr (A,D), AMMN (B,E) or NNK-4-OAc (C, F).

Table S1. Cytotoxicity and mutagenicity data obtained for NMUr, AMMN and NNK-4-OAc in CHO<sup>pcDNA3</sup> and CHO<sup>AGT</sup> cells.

| CHO <sup>pcDNA3</sup> | $\mu$ M   | N         | % Survival         | <i>hprt</i> mutants/10 <sup>5</sup> cells |                |
|-----------------------|-----------|-----------|--------------------|-------------------------------------------|----------------|
|                       |           |           | AVERAGE $\pm$ s.d. | AVERAGE $\pm$ s.d.                        |                |
| NMUr                  | 0         | 8         | 100 $\pm$ 6        | 42 $\pm$ 15                               |                |
|                       | 0.5       | 5         | 88 $\pm$ 11        | 48 $\pm$ 14                               |                |
|                       | 0.75      | 3         | 64 $\pm$ 6         | 120 $\pm$ 13                              |                |
|                       | 1.0       | 5         | 43 $\pm$ 4         | 99 $\pm$ 11                               |                |
|                       | 2.0       | 2         | 19 $\pm$ 3         | 164 $\pm$ 11                              |                |
|                       | 2.5       | 6         | 10 $\pm$ 3         | 466 $\pm$ 93                              |                |
|                       | 4.0       | 2         | 6 $\pm$ 3          | 448 $\pm$ 9                               |                |
|                       | 5.0       | 6         | 2 $\pm$ 1          | 760 $\pm$ 88                              |                |
|                       | 7.5       | 6         | 1 $\pm$ 1          | 1367 $\pm$ 499                            |                |
| 8.0                   | 2         | 1 $\pm$ 1 | 1950 $\pm$ 23      |                                           |                |
| AMMN                  | 0         | 8         | 100 $\pm$ 8        | 31 $\pm$ 14                               |                |
|                       | 0.25      | 6         | 82 $\pm$ 14        | 57 $\pm$ 18                               |                |
|                       | 0.5       | 8         | 51 $\pm$ 15        | 134 $\pm$ 45                              |                |
|                       | 1.0       | 8         | 17 $\pm$ 5         | 270 $\pm$ 98                              |                |
|                       | 2.0       | 8         | 5 $\pm$ 4          | 734 $\pm$ 281                             |                |
|                       | 4.0       | 8         | 1 $\pm$ 1          | 1968 $\pm$ 215                            |                |
| NNK-4-OAc             | 0         | 8         | 100 $\pm$ 6        | 42 $\pm$ 15                               |                |
|                       | 0.25      | 5         | 52 $\pm$ 12        | 156 $\pm$ 36                              |                |
|                       | 0.5       | 5         | 17 $\pm$ 9         | 276 $\pm$ 42                              |                |
|                       | 1         | 8         | 2 $\pm$ 2          | 699 $\pm$ 180                             |                |
|                       | 1.75      | 5         | 0.8 $\pm$ 0.8      | 1641 $\pm$ 159                            |                |
|                       | 2.5       | 8         | 0.1 $\pm$ 0.2      | 3238 $\pm$ 800                            |                |
| CHO <sup>AGT</sup>    | NMUr      | 0         | 8                  | 100 $\pm$ 5                               | 188 $\pm$ 119  |
|                       |           | 50        | 5                  | 74 $\pm$ 6                                | 201 $\pm$ 42   |
|                       |           | 75        | 5                  | 54 $\pm$ 14                               | 225 $\pm$ 41   |
|                       |           | 100       | 5                  | 38 $\pm$ 7                                | 337 $\pm$ 65   |
|                       |           | 150       | 5                  | 16 $\pm$ 3                                | 535 $\pm$ 62   |
|                       |           | 200       | 5                  | 7 $\pm$ 2                                 | 542 $\pm$ 68   |
|                       |           | 250       | 6                  | 2 $\pm$ 1                                 | 582 $\pm$ 188  |
|                       |           | AMMN      | 0                  | 8                                         | 100 $\pm$ 7    |
|                       | 10        |           | 8                  | 90 $\pm$ 12                               | 145 $\pm$ 119  |
|                       | 20        |           | 8                  | 71 $\pm$ 20                               | 164 $\pm$ 58   |
|                       | 30        |           | 6                  | 51 $\pm$ 12                               | 369 $\pm$ 213  |
|                       | 40        |           | 8                  | 25 $\pm$ 15                               | 568 $\pm$ 227  |
|                       | 60        |           | 6                  | 11 $\pm$ 9                                | 1435 $\pm$ 537 |
|                       | NNK-4-OAc |           | 0                  | 8                                         | 100 $\pm$ 5    |
|                       |           | 5         | 5                  | 86 $\pm$ 16                               | 200 $\pm$ 97   |
| 10                    |           | 8         | 66 $\pm$ 20        | 244 $\pm$ 57                              |                |
| 20                    |           | 8         | 21 $\pm$ 10        | 373 $\pm$ 64                              |                |
| 30                    |           | 5         | 4 $\pm$ 3          | 462 $\pm$ 78                              |                |
| 40                    |           | 8         | 0.2 $\pm$ 0.3      | 945 $\pm$ 402                             |                |

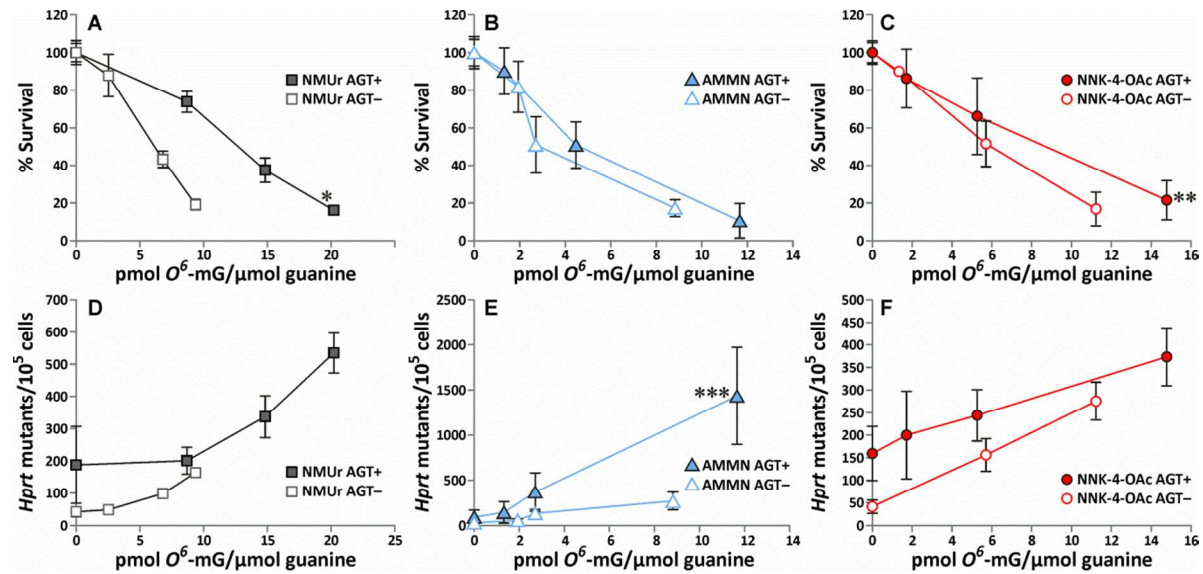

Figure S1. Cytotoxicity (A-C) or mutagenicity (D-F) compared to levels of O<sup>6</sup>-mG detected in CHO<sup>pCDNA3</sup> (AGT-) and CHO<sup>AGT</sup> (AGT+) cells immediately after a 1 h treatment with NMUr (A,D), AMMN (B,E) or NNK-4-OAc (C, F). Levels of O<sup>6</sup>-mG are averages of three replicates. Cytotoxicity and mutagenicity data are averages from 3-4 separate experiments performed with duplicates or triplicates. Error bars represent standard deviation. The lines were generated by connecting the data points. \*Significantly different than CHO<sup>pCDNA3</sup> (AGT-) cells,  $p = 2 \times 10^{-10}$ ; \*\*Significantly different than CHO<sup>pCDNA3</sup> (AGT-) cells,  $p = 0.03$ ; \*\*\*Significantly different than CHO<sup>pCDNA3</sup> (AGT-) cells,  $p = 3 \times 10^{-7}$ .
